# Supplementary material
Source: PubMed Central journal article supplement (PMC8174014)
Supplement: sj-pdf-1-ctj-10.1177_1740774520988298.pdf [file sj-pdf-1-ctj-10.1177_1740774520988298.pdf]

**Table S1. Elements of Shared Infrastructure**

| <b>Element</b>                                    | <b>Description</b>                                                                                                                                                        |
|---------------------------------------------------|---------------------------------------------------------------------------------------------------------------------------------------------------------------------------|
| COVID Endpoint Registry                           | Registry of all primary endpoints considered for trials in the US pending or granted IRB-approval                                                                         |
| COVID DSMB Registry                               | International registry of 1) DSMB members available for COVID studies and of 2) individuals willing to support DSMBs as the independent statistician or statistical group |
| Charters                                          | Charters for DSMBs and Steering Committees with text addressing issues unique to COVID                                                                                    |
| Standard Operating Procedures                     | Documents describing procedures related to DSMB coordination, blinding, randomization, data management, and database lock                                                 |
| Statistical Analysis Plans (SAPs)                 | A standardized analytic plan for analysis with common data elements that allow for merging of data requiring variables to be uniform and similarly ascertained            |
| Database Capture and Electronic Case Report Forms | Shared data elements and standardized capture of variables                                                                                                                |
| Design and Analysis Team Dedicated to COVID       | A team devoted to COVID-related studies familiar with issues unique to COVID, endpoints used and sources of variation in data generated                                   |
| Platform Protocol                                 | A protocol that enables the simultaneous evaluation of multiple agents or combinations of agents for the same disease and study population                                |
