# Supplementary material
Source: PubMed Central journal article supplement (PMC8174014)
Supplement: sj-pdf-2-ctj-10.1177_1740774520988298.pdf [file sj-pdf-2-ctj-10.1177_1740774520988298.pdf]

**Figure S1. Number of registered experts by area of expertise**

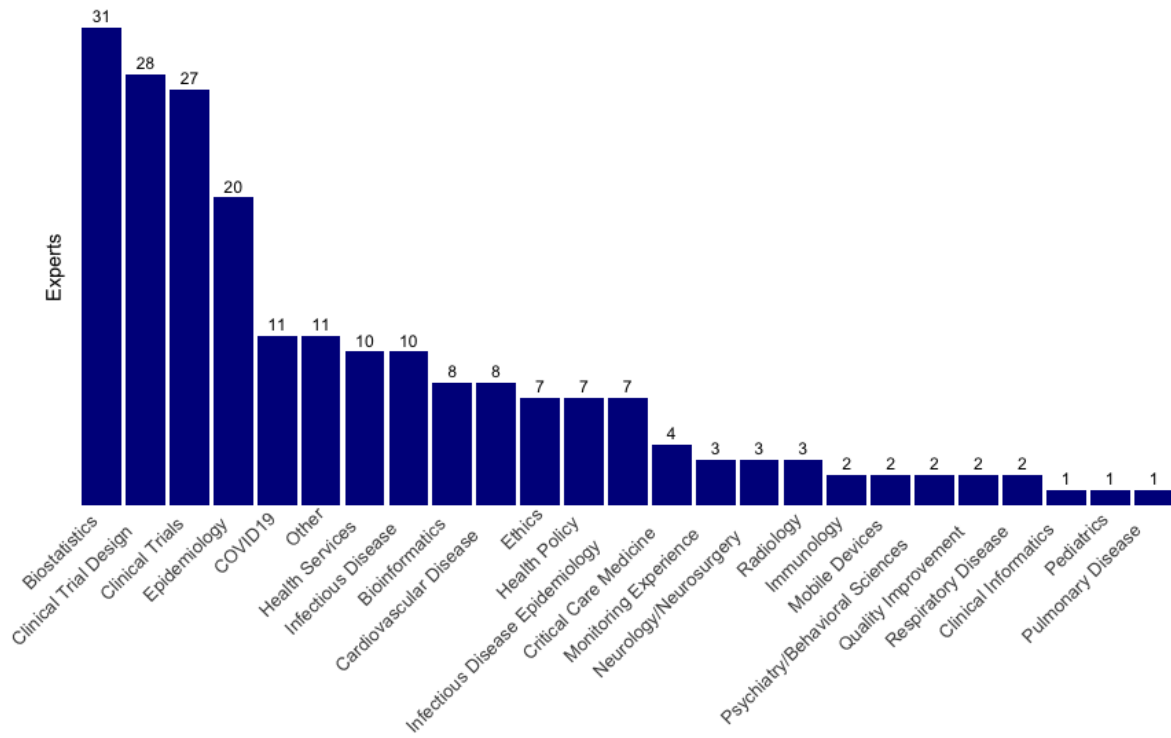

*Note: Experts can indicate multiple areas of expertise*
